**A**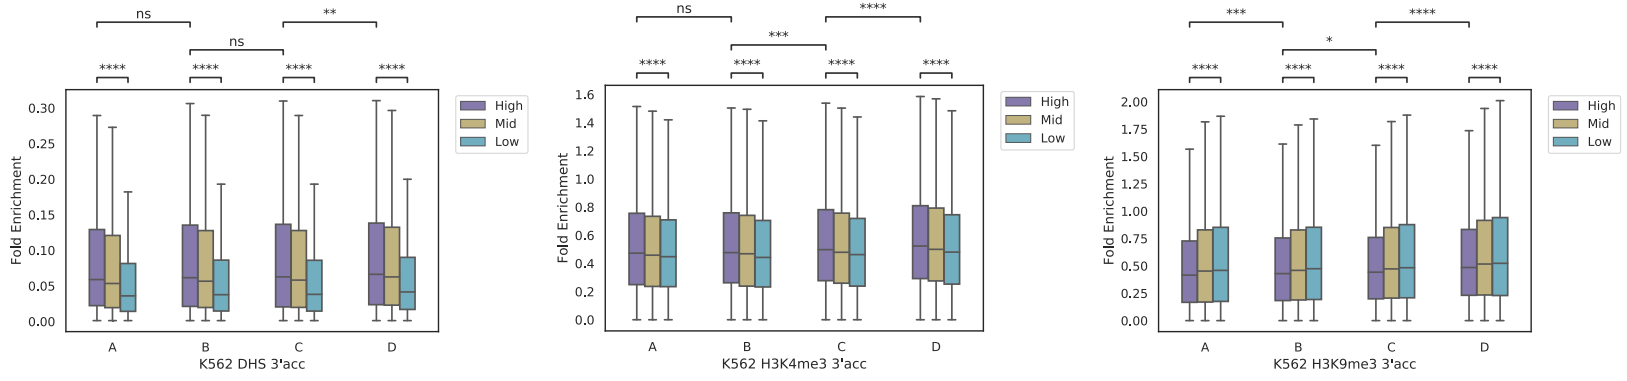**B**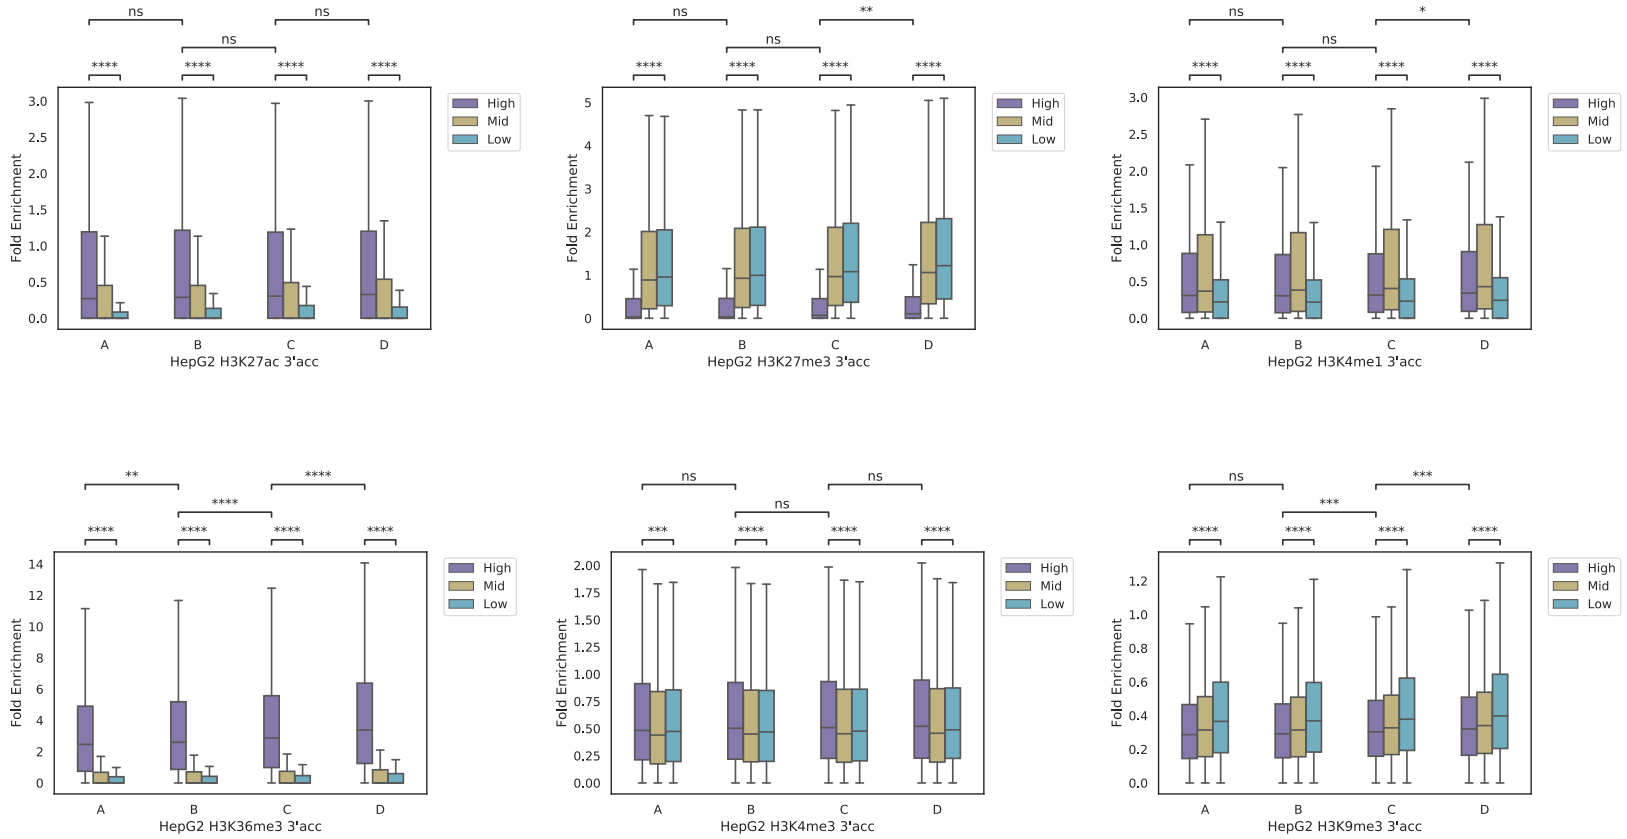**C**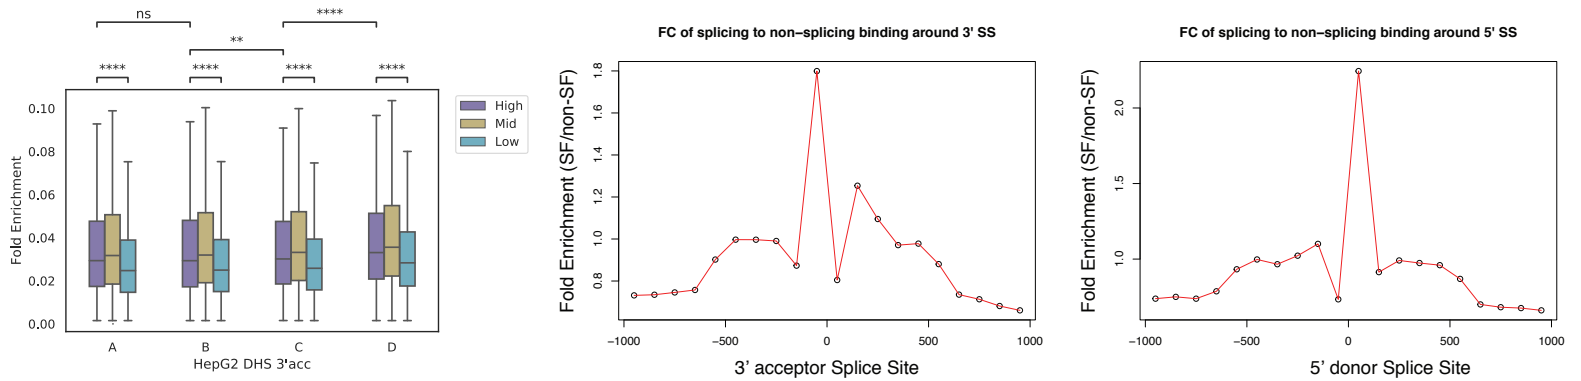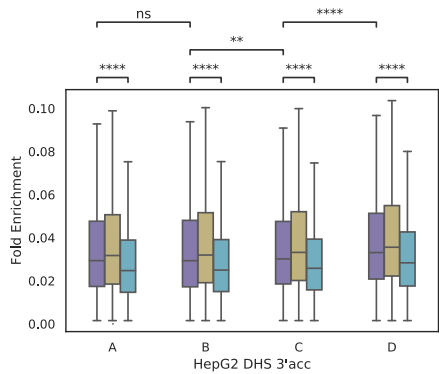

Source: https://storage.googleapis.com/plos-corpus-prod/10.1371/journal.pcbi.1008006/2/pcbi.1008006.s006.pdf
