**A**

PR curve for HepG2 sample

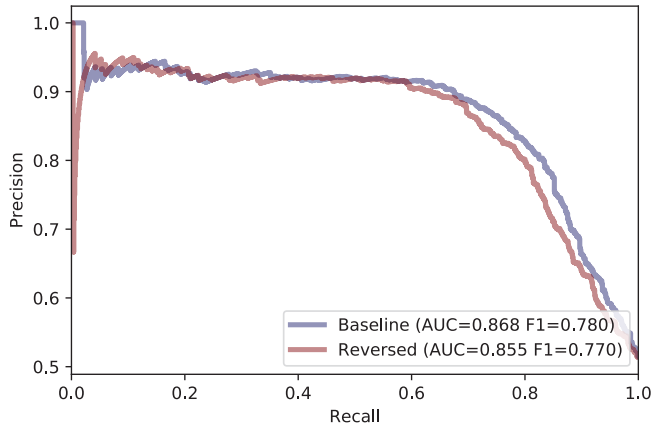**B**

ROC curve for HepG2 sample

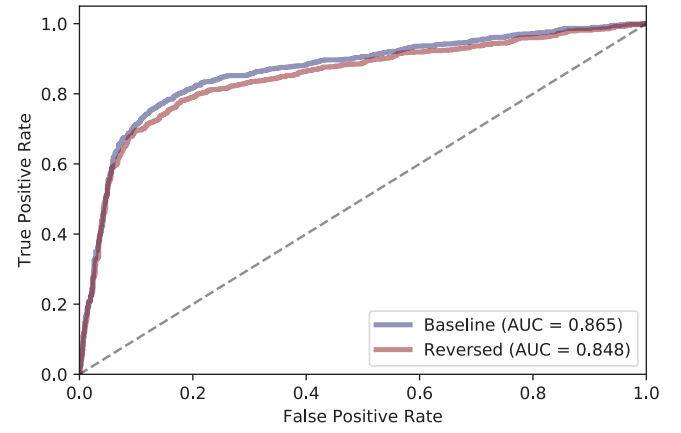**C**

PR curve for K562 sample

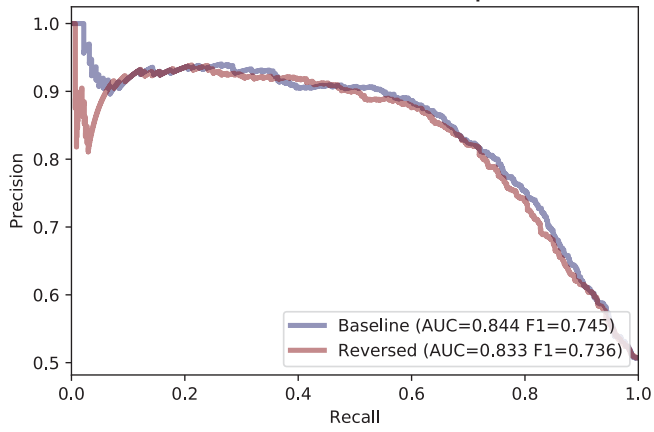**D**

ROC curve for K562 sample

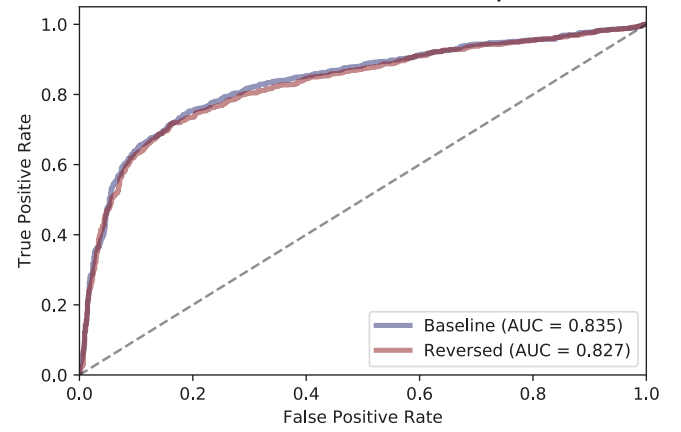

Source: https://storage.googleapis.com/plos-corpus-prod/10.1371/journal.pcbi.1008006/2/pcbi.1008006.s013.pdf
